# Supplementary material for: Low temperature UV cross-linked fluorinated polyurethane for organic thin film transistors
Source: Royal Society of Chemistry journal article supplement (doi:10.1039/d4tc00295d), 2024-01-01
Supplement: d4tc00295d1.pdf [file d4tc00295d1.pdf]

## Support Information

### Low Temperature UV Cross-linked Fluorinated Polyurethane for Organic Thin Film Transistors

Ruixia Duan<sup>a</sup>, Sixu Liu<sup>a</sup>, Xuying Liu<sup>a</sup>, Miaoming Huang<sup>a</sup>, Suqin He<sup>a,b</sup>, Hao Liu<sup>a,\*</sup>, Wentao Liu<sup>a,\*</sup>, Chengshen Zhu<sup>a</sup>

<sup>a</sup> School of Materials Science and Engineering, Zhengzhou University, Zhengzhou 450001, China.

<sup>b</sup> Henan Key Laboratory of Advanced Nylon Materials and Application, Zhengzhou University, Zhengzhou, 450001, China.

\*Corresponding authors: Wentao Liu (wtliu@zzu.edu.cn) and Hao Liu (hliu@zzu.edu.cn).

Table S1 The gel content in DMF for PU and FPU samples

| Sample | M1 (g) | M2 (g) | Gel content (%) |
|--------|--------|--------|-----------------|
| PU     | 0.0686 | 0.0649 | 94.6            |
| FPU-1% | 0.1787 | 0.1675 | 93.7            |
| FPU-3% | 0.1411 | 0.1298 | 91.9            |
| FPU-5% | 0.1149 | 0.1070 | 93.1            |

M1: Mass before soaking with DMF, M2: Mass after soaking with DMF.

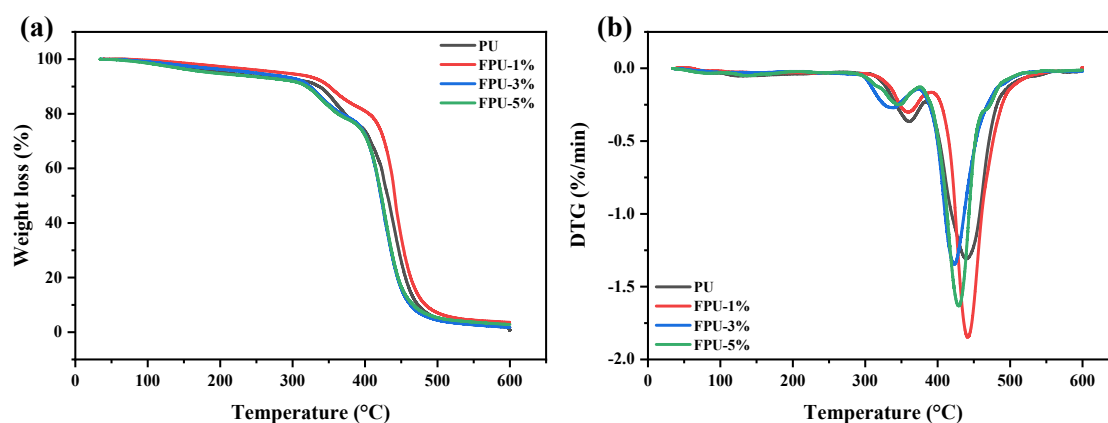

Figure S1 (a) TGA curve and (b) DTG curve for four samples

Table S2 The TGA data of PU and FPU samples

| Sample | T5% (°C) | Tmax1 (°C) | Tmax2 (°C) | Tmax3 (°C) | CR600 (%) |
|--------|----------|------------|------------|------------|-----------|
| PU     | 204.6    | 129.5      | 360.7      | 440.5      | 1.65      |
| FPU-1% | 282.4    | 167.2      | 359.1      | 441.6      | 3.11      |
| FPU-3% | 241.7    | 150.3      | 334.8      | 422.4      | 1.73      |
| FPU-5% | 187.5    | 134.2      | 342.7      | 428.2      | 2.80      |

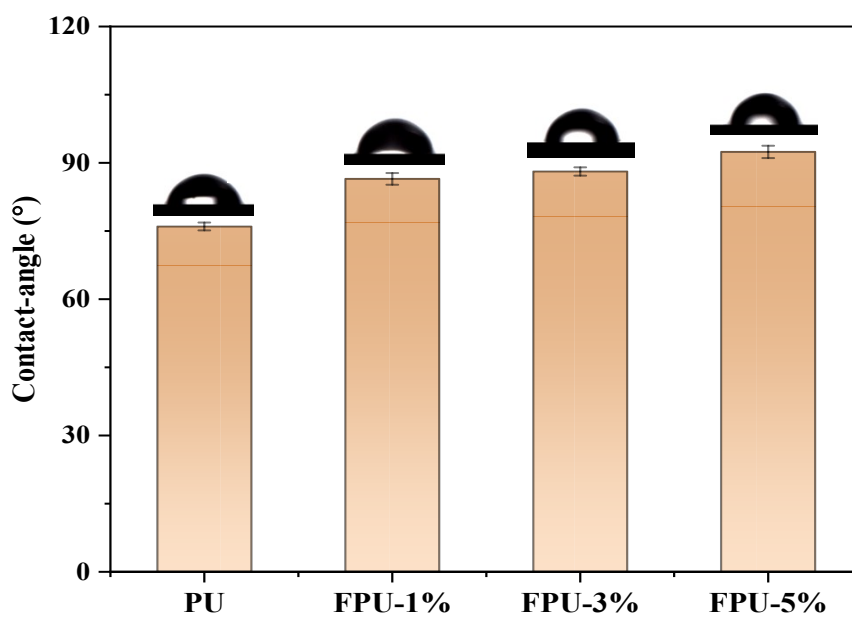

Figure S2 contact angle of four film samples

Table S3 The surface properties of PU and FPU

| Sample | Film thickness (nm) | RMS (nm) | WCA (°) |
|--------|---------------------|----------|---------|
| PU     | 393.6               | 0.318    | 78.5    |
| FPU-1% | 413.6               | 0.351    | 86.8    |
| FPU-3% | 397.1               | 0.477    | 88.1    |
| FPU-5% | 408.4               | 0.490    | 90.1    |

Table S4 The dielectric properties of PU and FPU films at 100 Hz

| Sample | $C_i$ (nF/cm <sup>2</sup> ) | $\kappa$ (100 Hz) | D   |
|--------|-----------------------------|-------------------|-----|
| PU     | 8.2                         | 3.9±0.1           | 1.2 |
| FPU-1% | 7.4                         | 3.8±0.2           | 2.1 |
| FPU-3% | 9.9                         | 5.1±0.1           | 1.3 |
| 0.1    | 12.0                        | 5.8±0.2           | 5.2 |
